# Supplementary material for: Phosphorus removal performance of spark deposited iron and aluminium metal oxide nanoparticles on polyacrylonitrile membranes
Source: Research Square preprint supplement (doi:10.21203/rs.3.rs-7514055/v1), 2025-09-16
Supplement: Supplementary file 1 [file 9b6190942fd8f91716e5f5c5.docx]

**Table 1**

Isothermal model fitting parameters for phosphate adsorption by FeAl-ESA@PAN

| isothermal model | parameters | Temperature (K) | | |
| --- | --- | --- | --- | --- |
| 298 | 303 | 308 |
| Langmuir | qmax (mg·g-1) | 103.903 | 161.492 | 203.022 |
| KL (L·mg-1) | 0.108 | 0.067 | 0.053 |
| RL | 0.649 | 0.749 | 0.79 |
| R2 | 0.994 | 0.997 | 0.996 |
| Freundlich | 1/n | 0.881 | 0.923 | 0.939 |
| KF (L·mg-1) | 9.877 | 10.002 | 10.080 |
| R2 | 0.998 | 0.996 | 0.997 |
| Temkin | Kt (L·mg-1) | 9.140 | 9.705 | 9.949 |
| f | 0.308 | 0.284 | 0.276 |
| R2 | 0.950 | 0.940 | 0.914 |

**Table 2**

Fitting parameters of the kinetic model for phosphate adsorption by FeAl-ESA@PAN

| kinetic model | parameters | |
| --- | --- | --- |
| Pseudo-first-order (PFO) | K1 (min-1) | 0.219 |
| qe (mg·g-1) | 20.650 |
| R2 | 0.993 |
| Pseudo-Second-order (PSO) | K2 (g·min-1·L-1) | 0.0186 |
| qe (mg·g-1) | 20.741 |
| R2 | 0.995 |
| Elovich (ELO) | a | 25592.877 |
| b | 0.808 |
| R2 | 0.995 |
